# Supplementary material for: Identification of MRP1 and its role in complete remission (CR) after induction therapy in Acute Myeloid Leukemia patients.
Source: Research Square preprint supplement (doi:10.21203/rs.3.rs-2002513/v1), 2022-09-02
Supplement: Supplementary file 1 [file 0668ef4238bc9f2c0b6d915b.docx]

Tables

Table 1 **Number of patients with and without remission in relation to MRP1 gene in AML patients**

| **MRP1**  ***G*ene** | **Achieve Remission** | | **P-value** |
| --- | --- | --- | --- |
| **Yes** | **No** |
|  |  |  |  |
| **High expression** | **4 (30.8%)** | 9 (69.2%) | 0.091^ |
| **Low expression** | 16 (59.3%) | 11 (40.7%) |

| **MRP1 Protein** | **Achieve Remission** | | **P-value** |
| --- | --- | --- | --- |
| **Yes** | **No** |
|  |  |  |  |
| **High expression** | 11 (40.7%) | 5 (38.5%) | 0.890^ |
| **Low expression** | 16 (59.3%) | 8 (61.5%) |

Table 2 **Number of patients with and without remission in relation to MRP1 protein in AML patient**

Table 3 **Association between FLT3 mutation and MRP 1 gene expression**

| ***MRP 1* gene** | **FLT3 Mutation** | | **P-value** |
| --- | --- | --- | --- |
| **Positive** | **Negative** |
| **High Expression** | 4 (66.7%) | 14 (43.8%) | 0.138^ |
| **Low Expression** | 2 (33.3%) | 18 (56.3%) |

Table 4 **Number of the patients with NPM1 mutation in association with MRP 1 gene expression**

| **MRP 1 Gene** | **NPM1** | | **P value** |
| --- | --- | --- | --- |
| **Positive** | **Negative** |
| **High expression** | 8 (40.0%) | 7(38.9%) | 0 .944^ |
| **Low expression** | 12(60%) | 11 (61.1%) |

Table 5 **Association between Favorable and unfavorable karyotyping with MRP 1 gene**

| **MRP 1 Gene** | **Karyotyping** | | **P value** |
| --- | --- | --- | --- |
| **Favorable** | **Unfavorable** |
| **High expression** | **7 (46.7%)** | **12 (50%)** | **0 .839^** |
| **Low expression** | **8 (53.3%)** | **12 (50%)** |

^ Chi square Test; P value < 0.05 considered as statistically significant
